# Supplementary material for: Nitrate Regulates Maize Root Transcriptome through Nitric Oxide Dependent and Independent Mechanisms
Source: MDPI journal article supplement (doi:10.3390/ijms22179527), 2021-09-02
Supplement: s1 [file s1]

# Nitrate regulates maize root transcriptome through nitric oxide dependent and independent mechanisms

Laura Ravazzolo <sup>1</sup>, Sara Trevisan <sup>1</sup>, Silvia Iori <sup>2</sup>, Cristian Forestan <sup>3</sup>, Mario Malagoli <sup>1</sup> and Silvia Quaggiotti <sup>1,\*</sup>

**Supplementary Materials:** The following are available online at <https://www.mdpi.com/article/10.3390/ijms22179527/s1>:

**Figure S1:** KEGG Search&Color Pathway representation of the pathway ‘Plant hormone signal transduction’ (zma04075). The analysis was defined by setting cluster 2 in brown (down-regulated by nitrate, NO-independent), cluster 3 in red (down-regulated by nitrate, NO-modulated), cluster 4 in violet (up-regulated by nitrate, NO-dependent), cluster 5 in yellow (up-regulated by nitrate, NO-independent) and cluster 6 in blue (up-regulated by nitrate, NO-modulated). In this pathway, no terms were found for cluster 1 (down-regulated by nitrate, NO-dependent).

**Table S1:** Summary of gene expression values (expressed as Reads Per Kb per Million, RPKM) for all treatments analyzed (-N; +NO<sub>3</sub><sup>-</sup>; +NO<sub>3</sub><sup>-</sup> +cPTIO).

**Table S2:** Summary of gene expression values (expressed as Reads Per Kb per Million, RPKM) for DEGs in the six clusters analyzed: Cluster 1, DEGs down-regulated by nitrate provision and NO-dependent; cluster 2, DEGs down-regulated by nitrate and NO-independent; cluster 3, DEGs down-regulated by nitrate and NO-modulated; cluster 4, DEGs up-regulated by nitrate provision and NO-dependent; cluster 5, genes up-regulated by nitrate provision and NO-independent; cluster 6, DEGs up-regulated by nitrate and NO-modulated.

**Table S3:** Complete Gene Ontology (GO) enrichments for each of the six clusters.

**Table S4:** Complete KEGG Reconstruction Pathways results for each of the six clusters.

**Table S5:** List of genes and primers used to validate RNA-seq dataset with Real-time PCR.

**Table S6:** Summary statistics of RNA-Seq read sequencing, quality trimming and mapping. For each condition (-N; +NO<sub>3</sub><sup>-</sup>; +NO<sub>3</sub><sup>-</sup> +cPTIO) three biological replicates were processed (R1, R2, R3). Replicate R1 for the +NO<sub>3</sub><sup>-</sup> +cPTIO treatment (highlighted in grey) did not correlate with the other replicates of the same treatment and was therefore excluded from further differential expression analysis.

**Supplementary Dataset 1:** Cuffdiff complete results of pairwise differential expression analyses (-N vs +NO<sub>3</sub><sup>-</sup> +cPTIO)

**Supplementary Dataset 2:** Cuffdiff complete results of pairwise differential expression analyses (+NO<sub>3</sub><sup>-</sup> vs +NO<sub>3</sub><sup>-</sup> +cPTIO)
